1 **Comprehensive analysis of prostate cancer life expectancy, loss of life**  
2 **expectancy, and healthcare expenditures: Taiwan national cohort**  
3 **study spanning 2008 to 2019**

4  
5 **Prostate cancer life expectancy, loss of life expectancy, and**  
6 **healthcare expenditures in Taiwan**

7  
8  
9 Pin-Chun Liu<sup>1¶</sup>, Yi-Sheng Lin<sup>1¶</sup>, Yen-Chuan Ou<sup>1\*</sup>, Chao-Yu Hsu<sup>1&</sup>, Min-Che Tung<sup>1&</sup>,  
10 Ying-Ming Chiu<sup>2,3,4¶</sup>

11

12 <sup>1</sup> Division of Urology, Department of Surgery, Tungs' Taichung Metroharbor Hospital,  
13 Taichung City, Taiwan

14 <sup>2</sup> Departments of Allergy, Immunology, and Rheumatology, Tungs' Taichung MetroHarbor  
15 Hospital, Taichung City, Taiwan

16 <sup>3</sup> Departments of big data research center, Tungs' Taichung MetroHarbor Hospital, Taichung  
17 City, Taiwan

**NOTE: This preprint reports new research that has not been certified by peer review and should not be used to guide clinical practice.**

18 <sup>4</sup>Departments of Post-Baccalaureate Medicine, College of Medicine, National Chung Hsing

19 University, Taichung City, Taiwan

20

21

22 \* Corresponding author

23 E-mail: [ycou228@gmail.com](mailto:ycou228@gmail.com) (YCO)

24

25

26 ¶These authors contributed equally to this work.

27 &These authors also contributed equally to this work.

28

29

30

31

32

33

34

## 35 **Abstract**

36

37 Prostate cancer (PCa) is the second most commonly diagnosed cancer worldwide and the 5th  
38 leading cause of death from cancer for men in Taiwan. The incidence of synchronous  
39 metastatic PCa in Taiwan is higher than U.S. and Europe. We aim to present the latest life  
40 expectancy (LE), loss of LE, and lifetime cost associated with PCa in Taiwan. The PCa data  
41 are based on Taiwan Cancer Registry and National Health Insurance Database. Total 30,207  
42 new cases of PCa were recorded during 2008-2019 nationwide. LE, estimated loss of LE and  
43 lifetime cost were stratified by age, cancer stage, Gleason score, grade group and serum PSA  
44 level at diagnosis. We compared LE and healthcare cost outcomes between synchronous  
45 metastatic PCa patients in 3 age groups. Among the 30,207 new cases, the low to intermediate  
46 risk groups, high-risk groups, and regional and metastatic PCa accounted for 54.1%, 13.2%,  
47 and 32.6% of cases, respectively. A considerable proportion of synchronous metastatic PCa  
48 was noted in Taiwan when compared with the U.S. For synchronous metastatic PCa, the  
49 highest LE is 9.22 years for ages 20-64 years, followed by ages 65-74 (8.29 years) and ages  
50 75-89 years (4.58 years). The loss of LE in the three groups is 13.63, 6.75, and 3.87 years,  
51 respectively. The healthcare cost of synchronous metastatic PCa in all age groups is higher  
52 than the average cost for PCa patients in Taiwan. This study provides real-world evidence to

53 support health care policy-making and clinical decisions regarding PCa. Due to the high  
54 proportion of synchronous metastatic PCa in Taiwan, the findings of this analysis emphasize  
55 the importance of early detection of PCa, which can save LE and decrease the total cost  
56 burden on the healthcare system.

57

## 58 **Introductions**

59

60 Prostate cancer (PCa) was the cancer with the highest incidence for men in 114 countries and  
61 the leading cause of cancer-related deaths among men in 56 countries in 2017 [1]. It  
62 accounted for 191,930 new cases and 33,330 deaths among U.S. males in 2020. From 2012 to  
63 2017, the incidence of PCa in the United States was 104.1 per 100,000 people, with a  
64 mortality rate of 19.1 per 100,000 people [2]. In Taiwan, PCa was responsible for the fifth  
65 cancer cause of death among male based on the statistics of cause of death in 2019 announced  
66 by the ministry of health and warfare. The estimated crude death rate caused by PCa is 13.1  
67 per 100,000 persons [3]. Statistics indicate a progressive increase in the incidence rate of PCa  
68 in Taiwan. Overall, the age-standardized incidence of PCa between 2008 and 2019 increased  
69 by 11.22% (from 24.61 to 35.83 per 100,000 people). The accurate reason could be  
70 complicated and multifactorial; proposed explanations include an aging population, the

71 popularization of blood tests, westernized diets, and lifestyle alterations. A previous study  
72 revealed a wide variation in the incidence and mortality rates of PCa in Asians. Compared  
73 with other Asian countries, the incidence of PCa in Taiwan is second only to Australia, New  
74 Zealand, and Turkey. [4].

75 The treatment of PCa imposed a great impact on both individuals and the country's financial  
76 burden. Gustavsen, Gary et al. indicated that the cumulative cost of managing localized PCa  
77 on a per-patient was estimated to be USD \$46,193 over 5 years and USD \$110,993 over 10  
78 years [5]. Smith-Palmer, J et al. mentioned that total overall cost in the first year after  
79 diagnosis of PCa was EUR 385 million in France, followed by EUR 244 million in Germany  
80 and then the United Kingdom at EUR 117 million per year in 2006 [6]. PCa also causes a  
81 great number of deaths worldwide annually. A study by Withrow, Diana et al. mentioned that  
82 3.5 million person-years of life were lost due to PCa in males over 50, with 40% of years of  
83 life lost occurring in those aged over 75 [7].

84 However, most of the previous studies are based on materials and documents from Western  
85 countries. Hwang et al. developed a novel semiparametric method to improve the accuracy of  
86 estimates of life expectancy (LE) and loss of life expectancy (loss of LE) from the date of  
87 diagnosis [8-9]. In this study, we estimated the PCa patients LE, loss of LE and lifetime  
88 health care expenditures, stratified by age and stage in the Taiwanese population with up to  
89 12 years of follow-up.

90

## 91 **Materials and Methods**

92

93 We identified a study cohort by using the database of Taiwan Cancer Registry (TCR)  
94 database from 2011 to 2017, and patients with PCa were identified by ICD-O-3 topography  
95 code: C61.9. Patients who were younger than 20 years of age or older than 90 years of age  
96 were excluded. TCR provides complete and high quality information on cancer medical  
97 records in Taiwan [10]. The data in the database has been de-identified, making it impossible  
98 to identify the subjects. Our study used data from TCR including gender, date of diagnosis,  
99 age at diagnosis, PCa stage, prostatic specific antigen (PSA), and Gleason's score. PSA value  
100 was divided into five levels: <4, 4-9, 10-19, 20-50 and >50 ng/ml. Gleason's score also was  
101 divided into five levels,  $\leq 6$ , 3+4, 4+3, 8 and 9-10. Gleason's score 3+4 indicates the primary  
102 pattern was 3 and the secondary pattern was 4. In contrast, 4+3 means the primary pattern was  
103 4 and the secondary pattern was 3.

104 The survival status of patients was verified by linkage with the National Mortality Registry.

105 All patients were followed until the end date of follow-up, the date of death or December 31,

106 2019, whichever came first. Survival function was generated via the Kaplan-Meier method

107 until the end of follow-up. LE was estimated by a semiparametric survival extrapolation

108 method, which was proposed by Hwang and Wang [8-9]. This method has been applied to  
109 various diseases such as rheumatoid Arthritis [11], dialysis [12-13], schizophrenia [14] and  
110 cancer [15]. Based on the life table of the National Vital Statistics of Taiwan, a reference  
111 group matching the age, sex and calendar year of PCa patients was generated by the Monte  
112 Carlo method. Assuming that the survival rate of the reference group was better than patients,  
113 the survival ratio between the patients and the reference group was logit-transformed each  
114 month. The survival rate of patients for the next month could be predicted by fitting restricted  
115 cubic spline models. Further extrapolation of survival rate was predicted by using a rolling  
116 extrapolation algorithm. Assuming the survival prediction for the next month was true and  
117 ignoring the data of the first month used in the previous prediction, do the prediction again  
118 until the survival rate approaches zero. The area under the survival curve of patients was  
119 defined as LE. Besides, the difference of LE between the patients and the reference group  
120 represents loss of LE. Loss of LE could be used as a measure of life loss because of disease.

121 The health care expenditures of each patient were confirmed by linkage with the national  
122 health insurance reimbursement database. The monthly average cost was calculated by adding  
123 the monthly costs of all patients, including the costs of inpatient and outpatient, and dividing  
124 by the number of these patients who were still alive in each month. Assuming that the  
125 patient's health care expenditures increase in the months before death, the average cost  
126 function is estimated by weighting the average cost of the patient's months before death.

127 Lifetime cost can be calculated via the monthly average cost function multiplied by the  
128 monthly survival function. Annual national health insurance expenditures were adjusted based  
129 on the 2019 Consumer Price Index and the exchange rate (1 USD = 30.93 TWDs), and then  
130 the estimated costs were adjusted at the annual discount rate (3%). The estimates of LE and  
131 lifetime costs were calculated by the free R package iSQoL2, and the study was reviewed and  
132 approved by the institutional review board of Tungs' Taichung MetroHarbor Hospital (IRB  
133 number:110034). The need for participant informed consent was waived by the ethics  
134 committee.

135

136

## 137 **Results**

138 A total of 30,207 patients with PCa were included in the study. Table 1 summarized the  
139 estimated LE, loss of LE, lifetime cost and mean cost per year stratified by age and stage.  
140 Survival curves of stages 1 to 3 were similar or even better than the matched reference group,  
141 which violated the assumption of LE estimation method that the survival rate of the patients  
142 should be worse than the reference group. Therefore, the LE and lifetime cost of those groups  
143 could not be estimated. In stage 4, the loss of LE for the 20-64 age groups was the highest at  
144 13.63 years, while the loss of LE for the 75-89 age groups was the lowest at 3.87 years. As for



145 the lifetime cost, the 20-64 age group is the highest, with 84,089 US dollars, while the 75-89  
146 age group is the lowest, with 35,841 US dollars. The results were similar in the mean cost per  
147 year, with \$9,893 for the 20-64 age group and \$4,573 for the 75-89 age groups.

148

149

150

151

152

153

154

155

156

157

158

159 Table 1. Estimation of life expectancy, loss of life expectancy, lifetimes cost (USD) and

160 means cost per year for prostate cancer, stratified by age and stage.

161

| Age group    | Stage   | N     | No. of death      | Age*           | LE (SE) #      | Loss of LE (SE) | Lifetime cost (SE) | Cost per year |
|--------------|---------|-------|-------------------|----------------|----------------|-----------------|--------------------|---------------|
| <b>20-64</b> |         |       |                   |                |                |                 |                    |               |
|              | Stage 1 | 1,016 | 39<br>(3.84%)     | 60.5±<br>4.03  | -              | -               | -                  | -             |
|              | Stage 2 | 2,733 | 137<br>(5.01%)    | 60.34<br>±3.97 | -              | -               | -                  | -             |
|              | Stage 3 | 718   | 53<br>(7.38%)     | 60.54<br>±3.91 | -              | -               | -                  | -             |
|              | Stage 4 | 1,652 | 732<br>(44.31%)   | 59.95<br>±4.2  | 9.22<br>(1.36) | 13.63<br>(1.36) | 84,089<br>(5,957)  | 9,893         |
| <b>65-74</b> |         |       |                   |                |                |                 |                    |               |
|              | Stage 1 | 1,413 | 139<br>(9.84%)    | 69.92<br>±2.83 | -              | -               | -                  | -             |
|              | Stage 2 | 5,057 | 631<br>(12.48%)   | 70.2±<br>2.9   | -              | -               | -                  | -             |
|              | Stage 3 | 1,594 | 210<br>(13.17%)   | 70.42<br>±2.79 | -              | -               | -                  | -             |
|              | Stage 4 | 3,173 | 1,445<br>(45.54%) | 70.44<br>±2.9  | 8.29<br>(0.48) | 6.75<br>(0.48)  | 68,109<br>(2,825)  | 8,690         |
| <b>75-89</b> |         |       |                   |                |                |                 |                    |               |
|              | Stage 1 | 1,053 | 335<br>(31.81%)   | 80.38<br>±3.88 | -              | -               | -                  | -             |
|              | Stage 2 | 5,093 | 1,742<br>(34.20%) | 80.57<br>±3.81 | -              | -               | -                  | -             |
|              | Stage 3 | 1,681 | 606<br>(36.05%)   | 80.51<br>±3.79 | -              | -               | -                  | -             |
|              | Stage 4 | 5,024 | 3,268<br>(65.05%) | 81.48<br>±3.96 | 4.58<br>(0.14) | 3.87<br>(0.14)  | 35,841<br>(918)    | 4,573         |

162

163 \*Age presented as mean±standard deviation; #SE, standard error of the mean; LE, Life

164 expectancy, in year; loss of LE, loss of life expectancy

165

166

167

168 In Table 2, the patients were stratified by age and PSA value. The survival rate of level 4-9

169 and 10-19 ng/ml were similar or even better than the reference group so LE can't be

170 estimated, either. However, the group of <4 ng/ml has worse survival than the reference

171 group. We reviewed the medical history of those patients and the result showed that a higher

172 proportion of transurethral resection of prostate (TURP) was performed one year before

173 cancer diagnosis in this group (S1 Fig). The PSA value usually decreased after TURP [16], so

174 we think the PSA level can't represent the actual value in <4 level group. In other groups of

175 20-50 and >50 ng/ml, regardless of age group, the higher the PSA value, the lower of LE, the

176 greater loss of LE, and higher mean cost per year.

177

178

179

180

181

182 Table 2. Estimation of life expectancy, loss of life expectancy, lifetimes cost (USD) and

183 means cost per year for prostate cancer, stratified by age and prostatic specific antigen (PSA).

| Age group    | PSA (ng/dL) | N     | No. of death      | Age*           | LE (SE) #       | Loss of LE (SE) | Lifetime cost (SE) | Cost per year |
|--------------|-------------|-------|-------------------|----------------|-----------------|-----------------|--------------------|---------------|
| <b>20-64</b> |             |       |                   |                |                 |                 |                    |               |
|              | < 4         | 686   | 115<br>(16.76%)   | 60.38<br>±3.78 | 18.55<br>(2.16) | 4.03<br>(2.16)  | 66,098<br>(5,272)  | 4,139         |
|              | 4-9         | 1,899 | 66<br>(3.49%)     | 59.98<br>±4.00 | -               | -               | -                  | -             |
|              | 10-19       | 1,309 | 89<br>(6.8%)      | 60.38<br>±3.84 | -               | -               | -                  | -             |
|              | 20-50       | 881   | 113<br>(12.83%)   | 60.59<br>±3.79 | 17.85<br>(3.02) | 4.49<br>(3.03)  | 82,336<br>(6,781)  | 5,250         |
|              | >50         | 1,435 | 575<br>(40.07%)   | 60.18<br>±4.03 | 9.16<br>(1.34)  | 13.51<br>(1.36) | 82,887<br>(6,638)  | 9,648         |
| <b>65-74</b> |             |       |                   |                |                 |                 |                    |               |
|              | < 4         | 1,280 | 301<br>(23.52%)   | 70.29<br>±2.85 | 12.86<br>(1.06) | 2.31<br>(1.05)  | 56,599<br>(3,215)  | 4,771         |
|              | 4-9         | 2,735 | 244<br>(8.92%)    | 69.92<br>±2.87 | -               | -               | -                  | -             |
|              | 10-19       | 2,384 | 261<br>(10.95%)   | 70.10<br>±2.94 | -               | -               | -                  | -             |
|              | 20-50       | 1,909 | 342<br>(17.92%)   | 70.50<br>±2.83 | 13.38<br>(1.29) | 1.68<br>(1.29)  | 70,688<br>(4,082)  | 5,684         |
|              | >50         | 2,907 | 1,205<br>(41.45%) | 70.49<br>±2.87 | 8.87<br>(0.57)  | 6.18<br>(0.57)  | 69,031<br>(2,967)  | 8,237         |
| <b>75-89</b> |             |       |                   |                |                 |                 |                    |               |
|              | < 4         | 1,500 | 661<br>(44.07%)   | 81.26<br>±4.07 | 7.18<br>(0.37)  | 1.47<br>(0.38)  | 32,892<br>(1,207)  | 4,709         |
|              | 4-9         | 1,700 | 479<br>(28.18%)   | 79.93<br>±3.71 | -               | -               | -                  | -             |
|              | 10-19       | 2,214 | 697<br>(31.48%)   | 80.28<br>±3.73 | -               | -               | -                  | -             |
|              | 20-50       | 2,395 | 964<br>(40.25%)   | 80.75<br>±3.81 | 7.53<br>(0.34)  | 1.33<br>(0.34)  | 43,763<br>(1,624)  | 5,938         |
|              | >50         | 4,808 | 2,918<br>(60.69%) | 81.45<br>±3.95 | 4.74<br>(0.16)  | 3.78<br>(0.16)  | 36,005<br>(833)    | 7,657         |

184

185 \*Age presented as mean±standard deviation; #SE, standard error of the mean; LE, Life

186 expectancy, in year; loss of LE, loss of life expectancy

187

188 Table 3 outlined the estimated LE, loss of LE, lifetime cost and mean cost per year stratified

189 by age and Gleason's Score. The groups of Gleason's Score ≤6 and 3+4 could not estimate

190 their LE and lifetime cost also because of similar or even better survival. Regardless of age

191 group, the group of Gleason's Score 9-10 had the greatest loss of LE. The highest lifetime

192 cost was the group of Gleason's Score 8. However, the highest mean cost was the group of

193 Gleason's Score 9-10.

194

195

196

197

198

199 Table 3. Estimation of life expectancy, loss of life expectancy, lifetimes cost (USD) and

200 means cost per year for prostate cancer, stratified by age and Gleason's score.

201

| Age group    | Gleason's score | N     | No. of death      | Age*           | LE (SE) #       | Loss of LE (SE) | Lifetime cost (SE) | Cost per year |
|--------------|-----------------|-------|-------------------|----------------|-----------------|-----------------|--------------------|---------------|
| <b>20-64</b> |                 |       |                   |                |                 |                 |                    |               |
|              | ≤ 6             | 2,118 | 102<br>(4.82%)    | 60.25<br>±3.87 |                 |                 |                    |               |
|              | 3+4             | 999   | 63<br>(6.31%)     | 60.26<br>±3.94 |                 |                 |                    |               |
|              | 4+3             | 816   | 96<br>(11.76%)    | 60.25<br>±3.92 | 16.91<br>(3.4)  | 5.75<br>(3.42)  | 77,071<br>(7,569)  | 5,068         |
|              | 8               | 827   | 143<br>(17.29%)   | 60.3±<br>3.82  | 16.75<br>(2.15) | 5.84<br>(2.15)  | 91,875<br>(6,472)  | 6,234         |
|              | 9-10            | 1,151 | 454<br>(39.44%)   | 60.24<br>±4.03 | 10.1<br>(1.48)  | 12.52<br>(1.47) | 79,800<br>(6,667)  | 8,565         |
| <b>65-74</b> |                 |       |                   |                |                 |                 |                    |               |
|              | ≤ 6             | 3,346 | 348<br>(10.4%)    | 70.04<br>±2.89 |                 |                 |                    |               |
|              | 3+4             | 1,849 | 250<br>(13.52%)   | 70.19<br>±2.88 | -               | -               | -                  | -             |
|              | 4+3             | 1,700 | 294<br>(17.29%)   | 70.39<br>±2.87 | 13.3<br>(1.56)  | 1.8<br>(1.56)   | 66,139<br>(4,099)  | 5,335         |
|              | 8               | 1,602 | 374<br>(23.35%)   | 70.3±<br>2.83  | 11.63<br>(1.35) | 3.51<br>(1.35)  | 73,643<br>(4,930)  | 6,748         |
|              | 9-10            | 2,316 | 902<br>(38.95%)   | 70.48<br>±2.9  | 10.01<br>(0.82) | 5.03<br>(0.83)  | 70,173<br>(3,750)  | 7,548         |
| <b>75-89</b> |                 |       |                   |                |                 |                 |                    |               |
|              | ≤ 6             | 2,693 | 818<br>(30.38%)   | 80.32<br>±3.81 |                 |                 |                    |               |
|              | 3+4             | 1,734 | 615<br>(35.47%)   | 80.39<br>±3.74 | -               | -               | -                  | -             |
|              | 4+3             | 1,997 | 805<br>(40.31%)   | 80.67<br>±3.8  | 7.23<br>(0.47)  | 1.69<br>(0.47)  | 42,540<br>(1,857)  | 5,984         |
|              | 8               | 2,045 | 912<br>(44.6%)    | 80.98<br>±3.96 | 7.2<br>(0.35)   | 1.56<br>(0.36)  | 43,089<br>(1,802)  | 6,152         |
|              | 9-10            | 3,468 | 2,085<br>(60.12%) | 81.43<br>±3.92 | 5.2<br>(0.22)   | 3.32<br>(0.22)  | 38,175<br>(1,159)  | 7,483         |

202 \*Age presented as mean±standard deviation; #SE, standard error of the mean; LE, Life

203 expectancy, in year; loss of LE, loss of life expectancy

204

205

## 206 **Discussion**

207

208 This study estimated the LE, loss of LE, and lifetime health care costs of PCa. LE was

209 estimated by a semiparametric survival extrapolation method, which was proposed by Hwang

210 and Wang [9-10]. This method has been applied to various diseases such as rheumatoid

211 arthritis [11], dialysis [12-13], schizophrenia [14] and cancer. It is the first time it has been

212 used to analyze the LE of PCa. The LE (shown in Table 1) of stages 1 to 3 PCa were similar

213 or even better than the matched reference group. The same result can be observed when LE,

214 loss of LE and lifetime healthcare costs has been stratified by age and PSA or age and

215 Gleason's score (shown in Table 2, 3). There are some possible explanations. First, the early

216 stage PCa has a good prognosis under the care of Taiwan's national health system. The

217 majority of the treatment can be subsidized by the national health system. Early-stage PCa

218 does not affect a patient's average LE. There is no significant difference in the statistics of LE

219 between stages 1-3 of PCa, whether in the 20-64 year old group or the 75-89 year old group.

220 Second, being diagnosed with cancer raises awareness of a patient's own health. Patients  
221 become more conscious of their health after being diagnosed with PCa. They also come to the  
222 hospital more often for follow-up of PCa, and if they have other health problems, they will be  
223 found earlier.

224 Our study also revealed another characteristic of PCa in Taiwan: a high proportion of  
225 synchronous metastatic PCa across all three age stratification. Synchronous metastatic PCa  
226 accounts for 27% in age group 20-64, 28.2% in age group 65-74, and 39% in age group over  
227 75, respectively. Among all newly diagnosed PCa patients, Taiwan exhibits a considerably  
228 high rate of synchronous metastatic PCa when compared to the United States. (32% vs. 5%).

229 [18] Based on the data presented, it's evident that a significant number of Taiwanese PCa  
230 patients receive late-stage diagnoses. Early detection of PCa has the potential to substantially  
231 decrease the incidence of synchronous metastatic PCa in Taiwan.

232 Health care expenditures are crucial for shaping national health policy and allocating public  
233 health resources within a finite budget. Early detection of PCa through PSA screening and  
234 digital rectal examination may allow for early disease stratification, thereby improving  
235 disease prognosis and enabling treatment before disease progression. Our data (Table 1)  
236 support this point of view: there is no significant difference in the statistics of LE, loss of LE,  
237 and lifetime health care costs between stages 1-3 of PCa. In end-stage PCa, it causes a loss of  
238 LE by 13.63, 6.75, and 3.87 years in the 20-64, 65-74, and 75-89 age groups, respectively.



239 The lifetime cost of end-stage PCa is \$84,089, \$68,109 and \$35,841 in the 20-64, 65-74, and  
240 75-89 age groups, respectively. In Table 2, the annual cost for PCa stratification by PSA level  
241 can be observed across all three age stratifications (\$9,648, \$8,237 and \$7,657, respectively).  
242 Early detection of PCa can save patients from experiencing a loss of LE and reduce the total  
243 lifetime cost and national health care expenditures.

244 PCa is the fifth leading cause of cancer-related deaths in Taiwan. However, routine PSA  
245 screening is not standard in Taiwan. There remains controversy of PSA screening for PCa  
246 within countries. Currently, only the five major cancers in Taiwan, namely colorectal cancer,  
247 oral cancer, cervical cancer, lung cancer, and breast cancer, have screening plans subsidized  
248 by the government. Taiwan's national health system disapproves of population-wide PSA  
249 screening programs for PCa. The lower incidence and mortality rate of PCa in Taiwan  
250 compared to those in Europe and the United States is a major reason for this decision. The  
251 health-care authority considers population-wide PSA screening to have low  
252 cost-effectiveness. Apart from this, the government has ignored the characteristics of PCa in  
253 Taiwan: a high proportion of synchronous metastatic PCa compared with other developed  
254 countries. On the other hand, unnecessary PSA screening might cause overdiagnosis and  
255 overtreatment, doing more harm than benefits to the patients [16]. The Taiwan Urological  
256 Association recommends early PSA testing only in male aged more than 50 year-old or male  
257 more than 45 year-old with family history of PCa. However, early PCa has few symptoms and

258 is often diagnosed as advanced PCa while symptomatic. As a result, many men diagnosed  
259 with PCa never know they have the disease unless they undergo an examination. To make  
260 matters worse, Taiwan's national health care system does not cover approaches like Magnetic  
261 Resonance Imaging and biomarkers, such as the Prostate Health Index, for the diagnosis of  
262 PCa.

263 Taiwan has had a national health insurance system since 1995, covering most of the medical  
264 expenses for PCa patients. This coverage extends from treatment modalities of radical  
265 prostatectomy, internal or external radiation therapy in the localized cancer, to androgen  
266 deprivation therapy, second-generation antiandrogens, and chemotherapy in the advanced  
267 stage of the disease. However, the nature of social welfare, universal cost coverage of national  
268 health insurance also places a heavy economic burden on itself. The increasing incidence and  
269 mortality rate of PCa make it a critical public health issue, posing a great economic burden on  
270 the national health system. Despite the growing number of therapies and treatments for PCa,  
271 it is associated with substantial societal costs and healthcare expenses. These costs are  
272 expected to rise with the incorporation of novel and more expensive technologies for  
273 managing PCa in the future. Early detection and treatment of PCa can contribute to reducing  
274 overall PCa medical costs. This is particularly relevant for the considerable medical costs  
275 associated with synchronous metastatic PCa. If the national healthcare system were to initiate  
276 strategies such as the introduction of a PSA screening program, it could further decrease

277 overall PCa costs and healthcare expenditures. This approach becomes especially crucial in

278 Taiwan, where a high rate of synchronous metastatic PCa has been recorded.

279 The strength of our study lies in its nationwide cohort and long-term follow-up period. The

280 data were obtained from the TCR database, which provides exhaustive, complete and high

281 quality information on cancer medical records in Taiwan. Although, the limitation is that the

282 study is inherently retrospective. Second of all, the total cost cannot exclude the cost caused

283 by other diseases.

284 In conclusion, this study provides real-world evidence to support early detection of PCa can

285 save LE and decrease the total cost burden on the healthcare system. The results of this study

286 contribute to better national healthcare resource allocation and policy decisions in PCa

287 treatment. Furthermore, it also raises awareness and public concern about PCa and highlights

288 its impact on the people of Taiwan, both in terms of loss of LE and lifetime cost.

289

## 290 **Conclusions**

291 This study provides real-world evidence to support health care policy-making and clinical

292 decisions regarding PCa. Due to the high proportion of synchronous metastatic PCa in

293 Taiwan, the findings of this analysis emphasize the importance of early detection of PCa,

294 which can save LE and decrease the total cost burden on the healthcare system.

295

## 296 **Acknowledgements**

297 Collection and assembly of data: Ya-Chu Yang

298

## 299 **Reference**

- 300 1. Global Burden of Disease Cancer Collaboration. Global, Regional, and National  
301 Cancer Incidence, Mortality, Years of Life Lost, Years Lived With Disability, and  
302 Disability-Adjusted Life-Years for 29 Cancer Groups, 1990 to 2017: A Systematic  
303 Analysis for the Global Burden of Disease Study. *JAMA Oncol.* 2019;5(12):1749–  
304 1768.
- 305 2. Siegel RL, Miller KD, Jemal A. Cancer statistics, 2020. *CA Cancer J Clin.* 2020  
306 Jan;70(1):7-30
- 307 3. Statistics of cause of death ministry of health and warfare. 2019.  
308 <https://www.mohw.gov.tw/lp-4650-2.html>
- 309 4. Kimura, Takahiro, and Shin Egawa. "Epidemiology of prostate cancer in Asian  
310 countries." *International journal of urology : official journal of the Japanese*  
311 *Urological Association* vol. 25,6 (2018): 524-531.

- 312 5. Gustavsen G, Gullet L, Cole D, Lewine N, Bishoff JT. Economic burden of illness  
313 associated with localized prostate cancer in the United States. *Future Oncol.*  
314 2020 Jan;16(1):4265-4277.
- 315 6. Smith-Palmer, J., Takizawa, C. & Valentine, W. Literature review of the burden of  
316 prostate cancer in Germany, France, the United Kingdom and Canada. *BMC Urol*  
317 19, 19 (2019)
- 318 7. Withrow D, Pilleron S, Nikita N, Ferlay J, Sharma S, Nicholson B, et al. Current and  
319 projected number of years of life lost due to prostate cancer: A global study.  
320 *Prostate.* 2022 Aug;82(11):1088-1097.
- 321 8. Hwang JS, Wang JD. Monte Carlo estimation of extrapolation of quality-adjusted  
322 survival for follow-up studies. *Stat Med.* 1999;18(13):1627-40.
- 323 9. Hwang JS, Hu TH, Lee LJ, Wang JD. Estimating lifetime medical costs from  
324 censored claims data. *Health Econ.* 2017;26(12):e332-e44.
- 325 10. Chiang CJ, You SL, Chen CJ, Yang YW, Lo WC, Lai MS. Quality assessment and  
326 improvement of nationwide cancer registration system in Taiwan: a review. *Jpn J*  
327 *Clin Oncol.* 2015;45(3):291-6.
- 328 11. Chiu YM, Lu YP, Lan JL, Chen DY, Wang JD. Lifetime Risks, Life Expectancy, and  
329 Health Care Expenditures for Rheumatoid Arthritis: A Nationwide Cohort

- 330 Followed Up From 2003 to 2016. *Arthritis Rheumatol.* 2021;73(5):750-8.
- 331 12. Kao TW, Huang JW, Hung KY, Chang YY, Chen PC, Yen CJ, et al. Life expectancy,  
332 expected years of life lost and survival of hemodialysis and peritoneal dialysis  
333 patients. *J Nephrol.* 2010;23(6):677-82.
- 334 13. Kao TW, Chang YY, Chen PC, Hsu CC, Chang YK, Chang YH, et al. Lifetime costs for  
335 peritoneal dialysis and hemodialysis in patients in Taiwan. *Perit Dial Int.*  
336 2013;33(6):671-8.
- 337 14. Lêng CH, Chou MH, Lin SH, Yang YK, Wang JD. Estimation of life expectancy,  
338 loss-of-life expectancy, and lifetime healthcare expenditures for schizophrenia in  
339 Taiwan. *Schizophr Res.* 2016;171(1-3):97-102.
- 340 15. Wu TY, Chung CH, Lin CN, Hwang JS, Wang JD. Lifetime risks, loss of life  
341 expectancy, and health care expenditures for 19 types of cancer in Taiwan. *Clin*  
342 *Epidemiol.* 2018;10:581-91.
- 343 16. Fonseca RC, Gomes CM, Meireles EB, Freire GC, Srougi M. Prostate specific  
344 antigen levels following transurethral resection of the prostate. *Int Braz J Urol.*  
345 2008;34(1):41-8.
- 346 17. Cabarkapa S, Perera M, McGrath S, Lawrentschuk N. Prostate cancer screening  
347 with prostate-specific antigen: A guide to the guidelines. *Prostate Int.* 2016

348 Dec;4(4):125-129.

349 18. Siegel DA, O'Neil ME, Richards TB, Dowling NF, Weir HK. Prostate Cancer

350 Incidence and Survival, by Stage and Race/Ethnicity - United States, 2001-2017.

351 MMWR Morb Mortal Wkly Rep. 2020 Oct 16;69(41):1473-1480.

352

## 353 **Supporting information**

354 S1 Figure The proportion of PCa patients who underwent TURP one year before PCa

355 diagnosis.
